# Supplementary material
Source: PubMed Central journal article supplement (PMC8820841)
Supplement: NIHMS1757446-supplement-supinfo.pdf [file NIHMS1757446-supplement-supinfo.pdf]

**Extracellular Matrix in Synthetic Hydrogel-based Prostate Cancer Organoids Regulate Therapeutic Response to EZH2 and DRD2 inhibitors**

*Matthew J Mosquera<sup>1</sup>, Sungwoong Kim<sup>2,3</sup>, Rohan Bareja<sup>4,5</sup>, Zhou Fang<sup>3</sup>, Shuangyi Cai<sup>3</sup>, Heng Pan<sup>4,5</sup>, Muhammad Asad<sup>6</sup>, M. Laura Martin<sup>4</sup>, Michael Sigouros<sup>4</sup>, Florencia M Rowdo<sup>4</sup>, Sarah Ackermann<sup>4</sup>, Jared Capuano<sup>4</sup>, Jacob Bernheim<sup>4</sup>, Cynthia Cheung<sup>4</sup>, Ashley Doane<sup>4</sup>, Nicholas Brady<sup>6</sup>, Richa Singh<sup>6</sup>, David S. Rickman<sup>6</sup>, Varun Prabhu<sup>7</sup>, Joshua E Allen<sup>7</sup>, Loredana Puca<sup>4</sup>, Ahmet Coskun<sup>3</sup>, Mark Rubin<sup>8</sup>, Himisha Beltran<sup>9</sup>, Juan Miguel Mosquera<sup>4,6</sup>, Olivier Elemento<sup>4,5\*</sup>, Ankur Singh<sup>1,2,3\*</sup>*

<sup>1</sup>Sibley School of Mechanical Engineering, Cornell University, Ithaca, NY, USA

<sup>2</sup>Woodruff School of Mechanical Engineering, Georgia Institute of Technology, Atlanta, GA, USA

<sup>3</sup>Coulter Department of Biomedical Engineering, Georgia Institute of Technology and Emory University School of Medicine, Atlanta, GA, USA

<sup>4</sup>Englander Institute for Precision Medicine, Weill Cornell Medicine-New York-Presbyterian Hospital, New York, NY, USA

<sup>5</sup>Institute for Computational Biomedicine, Weill Cornell Medicine, New York, NY, USA

<sup>6</sup>Department of Pathology and Laboratory Medicine, Weill Cornell Medicine, New York, NY, USA

<sup>7</sup>Chimerix, Inc., Durham, NC, USA

<sup>8</sup>Department for BioMedical Research, University of Bern, Bern, Switzerland

<sup>9</sup>Department of Medical Oncology, Dana Farber Cancer Institute, Harvard Medical School, Boston, MA, USA

\*Corresponding author: [ankur.singh@gatech.edu](mailto:ankur.singh@gatech.edu)

\*Corresponding author: [ole2001@med.cornell.edu](mailto:ole2001@med.cornell.edu)

**Keywords:** epigenetic, dopamine receptor, chemoresistance, neuroendocrine, tumor microenvironment

Supplementary Figure 1  
Related to Fig. 1

A

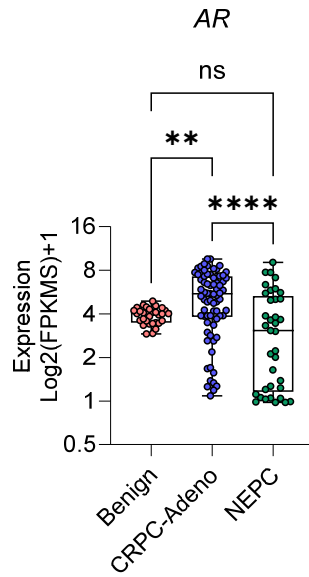

B

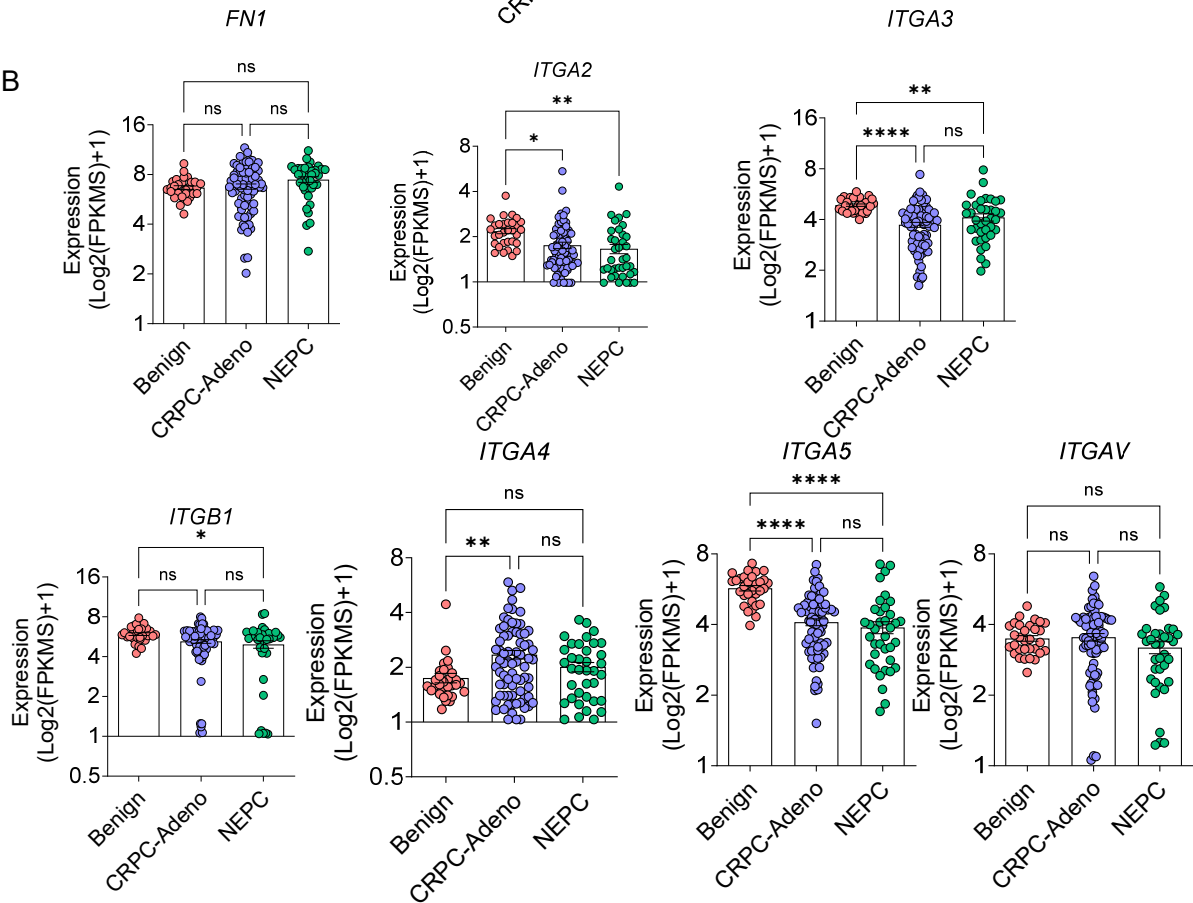

**Supplement Figure 1. Patient sample characterization.** A) Androgen receptor expression level in CRPC-NEPC patients. B) Transcriptomic expression of ECM and integrins across disease state

in the patient cohort. n =31 benign prostate, n =74 CRPC-Adeno, and n =37 CRPC-NEPC. All groups were compared by a one-way ANOVA, with posthoc Tukey's test with \*p<0.05, \*\* p<0.01, \*\*\*p<0.001, and \*\*\*\*p<0.0001.

Supplementary Figure 2  
Related to Fig. 1

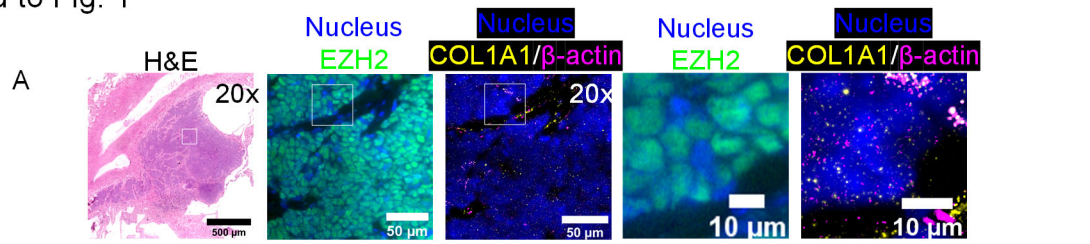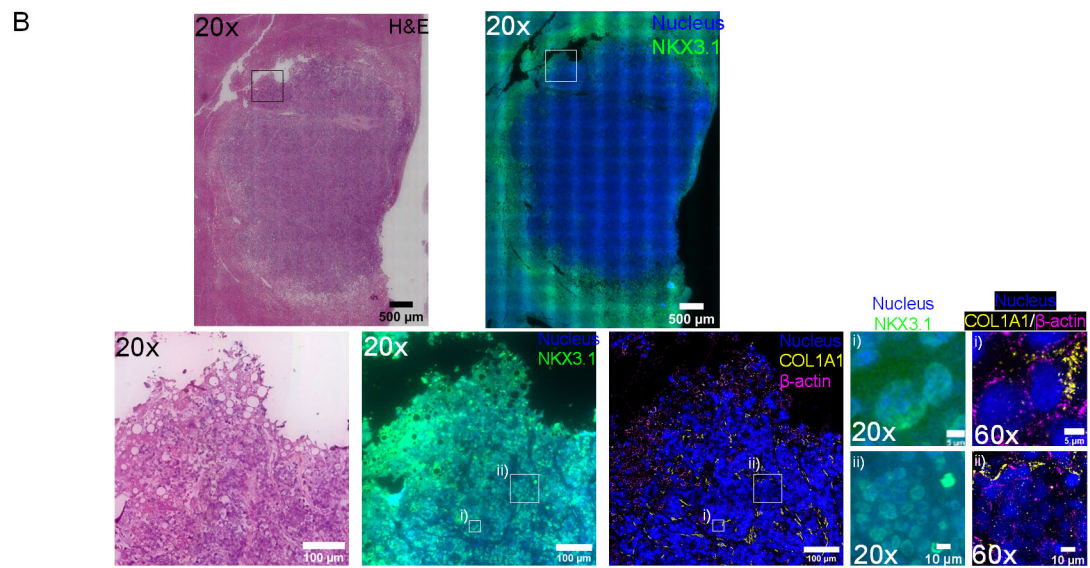

Collagen  
(Second Harmonic Generation)

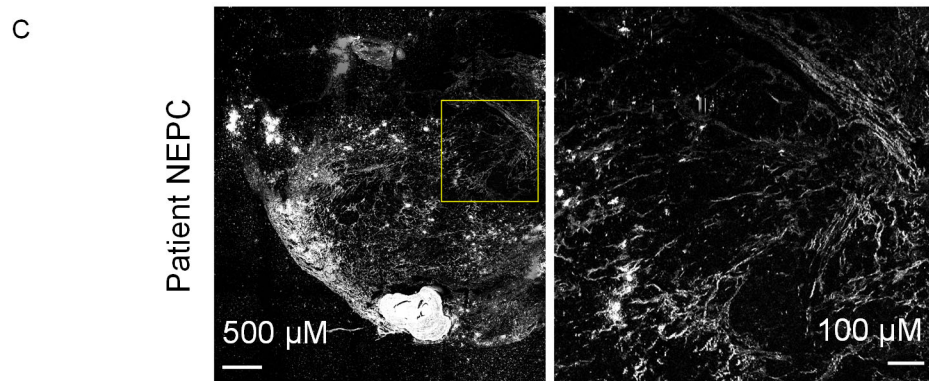

**Supplement Figure 2. Multiplexed single-cell analysis and SHG of prostate tumors.** A) H&E staining of CRPC-NEPC prostate tumors and immunostaining of EZH2 on CRPC-NEPC prostate tumors. Zoomed in images of single-cell EZH2 distributions (Green) in the second and third rows. Fluorescence in-situ hybridization (FISH) based detection of single COL1A1 AND B-actin RNA molecules in the same area of the CRPC-NEPC prostate tumors using a FISH signal amplification assay, Hybridization Chain Reaction (HCR). Zoomed in images of single-cell RNA distributions of COL1A1 (Yellow) and B-Actin (Magenta) in the second and third rows. Data representative of two patient biopsies. B) H&E staining of CRPC-Adeno prostate tumors and immunostaining of NKX3.1 on CRPC-Adeno prostate tumors. Zoomed in images of single-cell NKX3.1 distributions (Green) in the second and third rows. Fluorescence in-situ hybridization (FISH) based detection of single COL1A1 AND B-actin RNA molecules in the same area of the CRPC-Adeno prostate tumors using a FISH signal amplification assay, Hybridization Chain Reaction (HCR). Zoomed in images of single-cell RNA distributions of COL1A1 (Yellow) and B-Actin (Magenta) in the second and third rows. Data representative of two patient biopsies. C) Second harmonic generation microscopy images of collagen fibers in CRPC-NEPC tissues. The tissue samples were embedded in paraffin and stained with Synaptophysin (SYP). The SHG of tissue samples were imaged on a deparaffinized unstained slide using a two-photon microscope. Data representative of two patient biopsies.

Supplementary Figure 3  
Related to Fig. 1

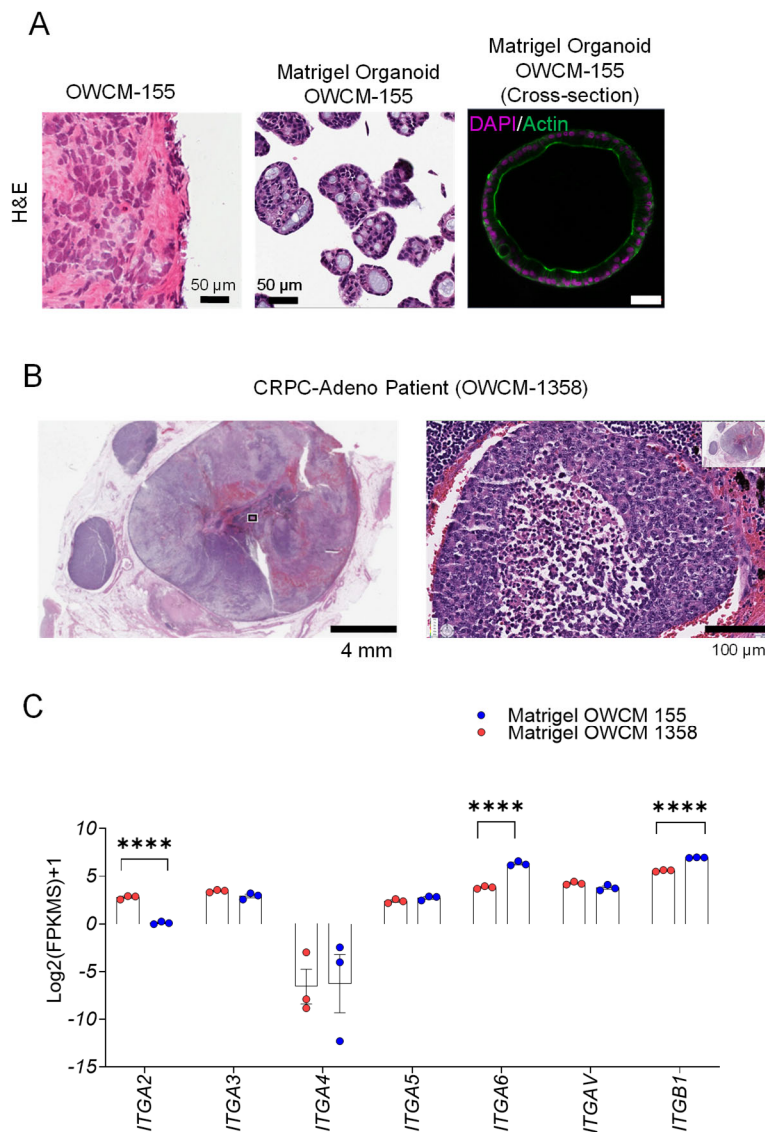

**Supplement Figure 2. Characterization of patient tumors and matrigel organoids.** A) H&E images of CRPC-NEPC patient OWCM-155, Matrigel organoids of the same patient tumor, and confocal image of OWCM-155 Matrigel organoids. B) H&E staining of a rapid autopsy specimen from a single CRPC-Adeno patient. C) Transcriptomic expression of integrins in CRPC-Adeno and CRPC-NEPC matrigel organoids (n = 3 each). All groups were compared by a one-way ANOVA, with posthoc Tukey's test (\*p<0.05, \*\*p<0.01, \*\*\*p<0.001, and \*\*\*\*p<0.0001).

Supplementary Figure 4  
Related to Fig. 2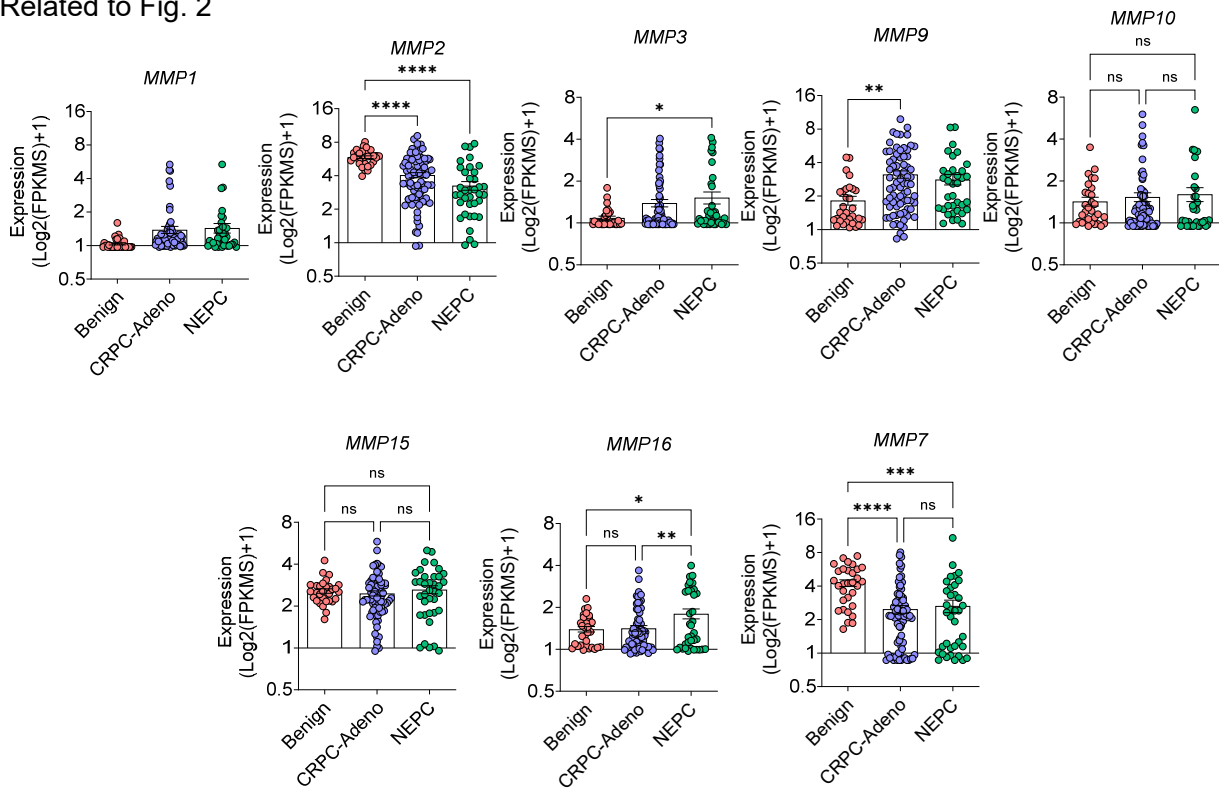

**Supplement Figure 4. MMP characterization.** Transcriptomic expression of MMPs across disease development in the WCMC patient cohort (n=31 Benign, n=74 CRPC-Adeno, n=37 CRPC-NEPC).

Supplementary Figure 5; Related to Fig. 2

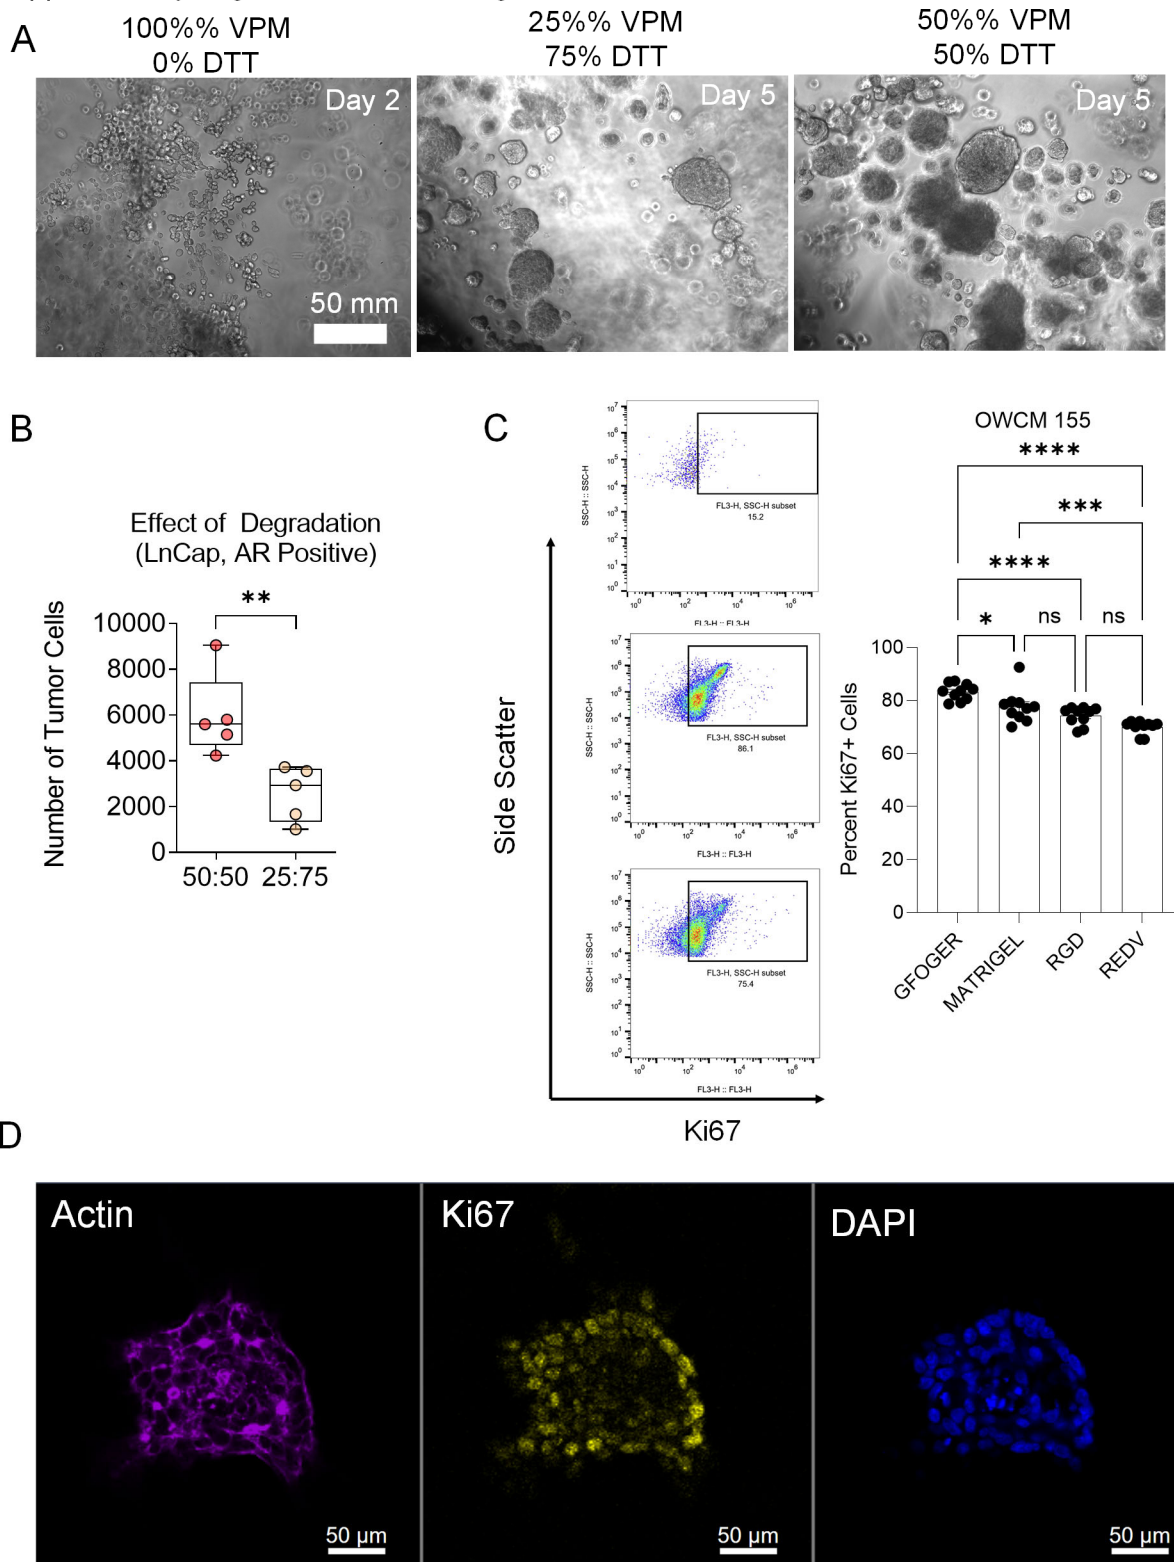

Supplement Figure 5. Organoid characterization. A) Phase-contrast images of PEG-4MAL



hydrogel-based organoids containing LnCap cells. Hydrogel were crosslinked with varying ratio of VPM and DTT to modulate degradation. **B)** Effect of degradation rate on growth of synthetic organoids containing LnCap cells (n=5). All groups were compared by an unpaired, two-tailed, t-test with \*p<0.05, \*\* p<0.01, \*\*\*p<0.001, and \*\*\*\*p<0.0001. **C)** Effect of ECM type on Ki67 expression in OWCM-155 tumors grown in synthetic hydrogel-based or Matrigel organoids (n=10).). All groups were compared by a one-way ANOVA, with posthoc Tukey's test (\*p<0.05, \*\*p<0.01, \*\*\*p<0.001, and \*\*\*\*p<0.0001). **D)** Confocal image of Ki67 expression in REDV-functionalized PEG-4MAL hydrogel organoid.

Supplementary Figure 6  
Related to Fig. 2

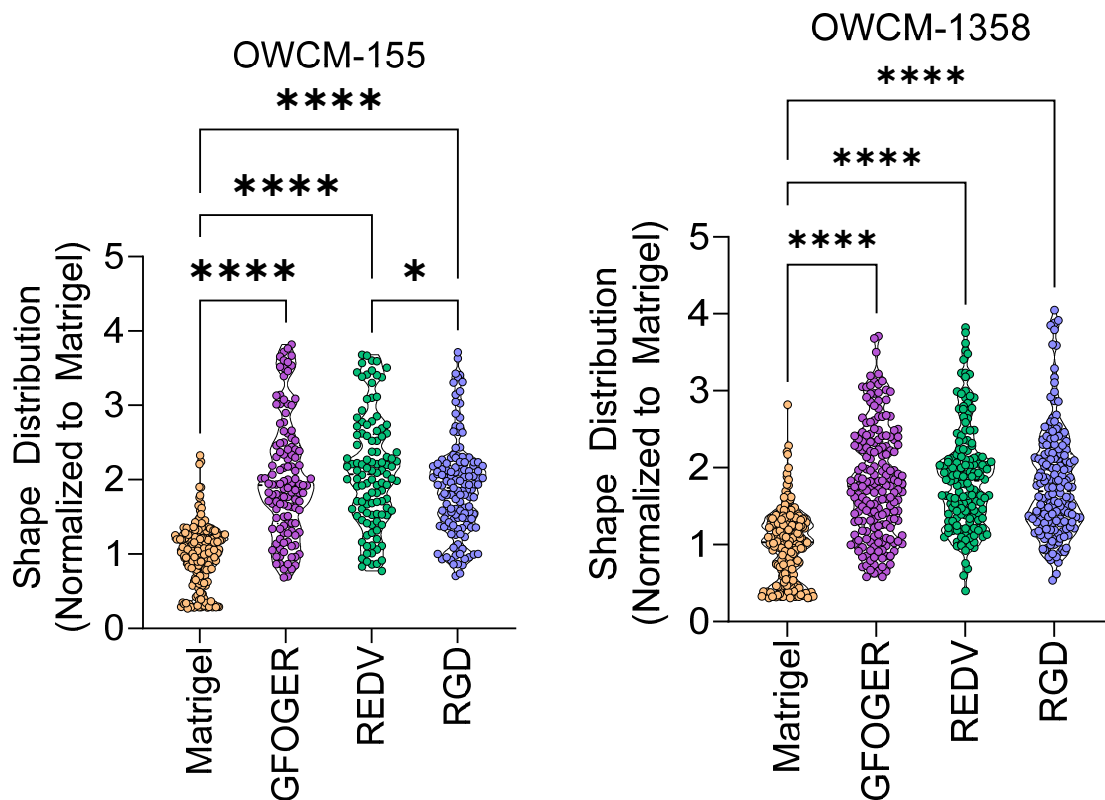

**Supplement Figure 6. Organoid characterization.** High content image analysis of prostate organoid shape distribution across ECM conditions in OWCM-155 (Matrigel n=204, RGD n=135, REDV n=113, GFOGER n=123 cell clusters, N =5 organoids each) and OWCM-1258 organoids (n=206 Matrigel, n=167 RGD, n=158 REDV, n=187 GFOGER). Groups were compared by a one-

way ANOVA, with posthoc Tukey's test with \*\*\*\*p<0.0001.

Supplementary Figure 7  
Related to Fig. 2

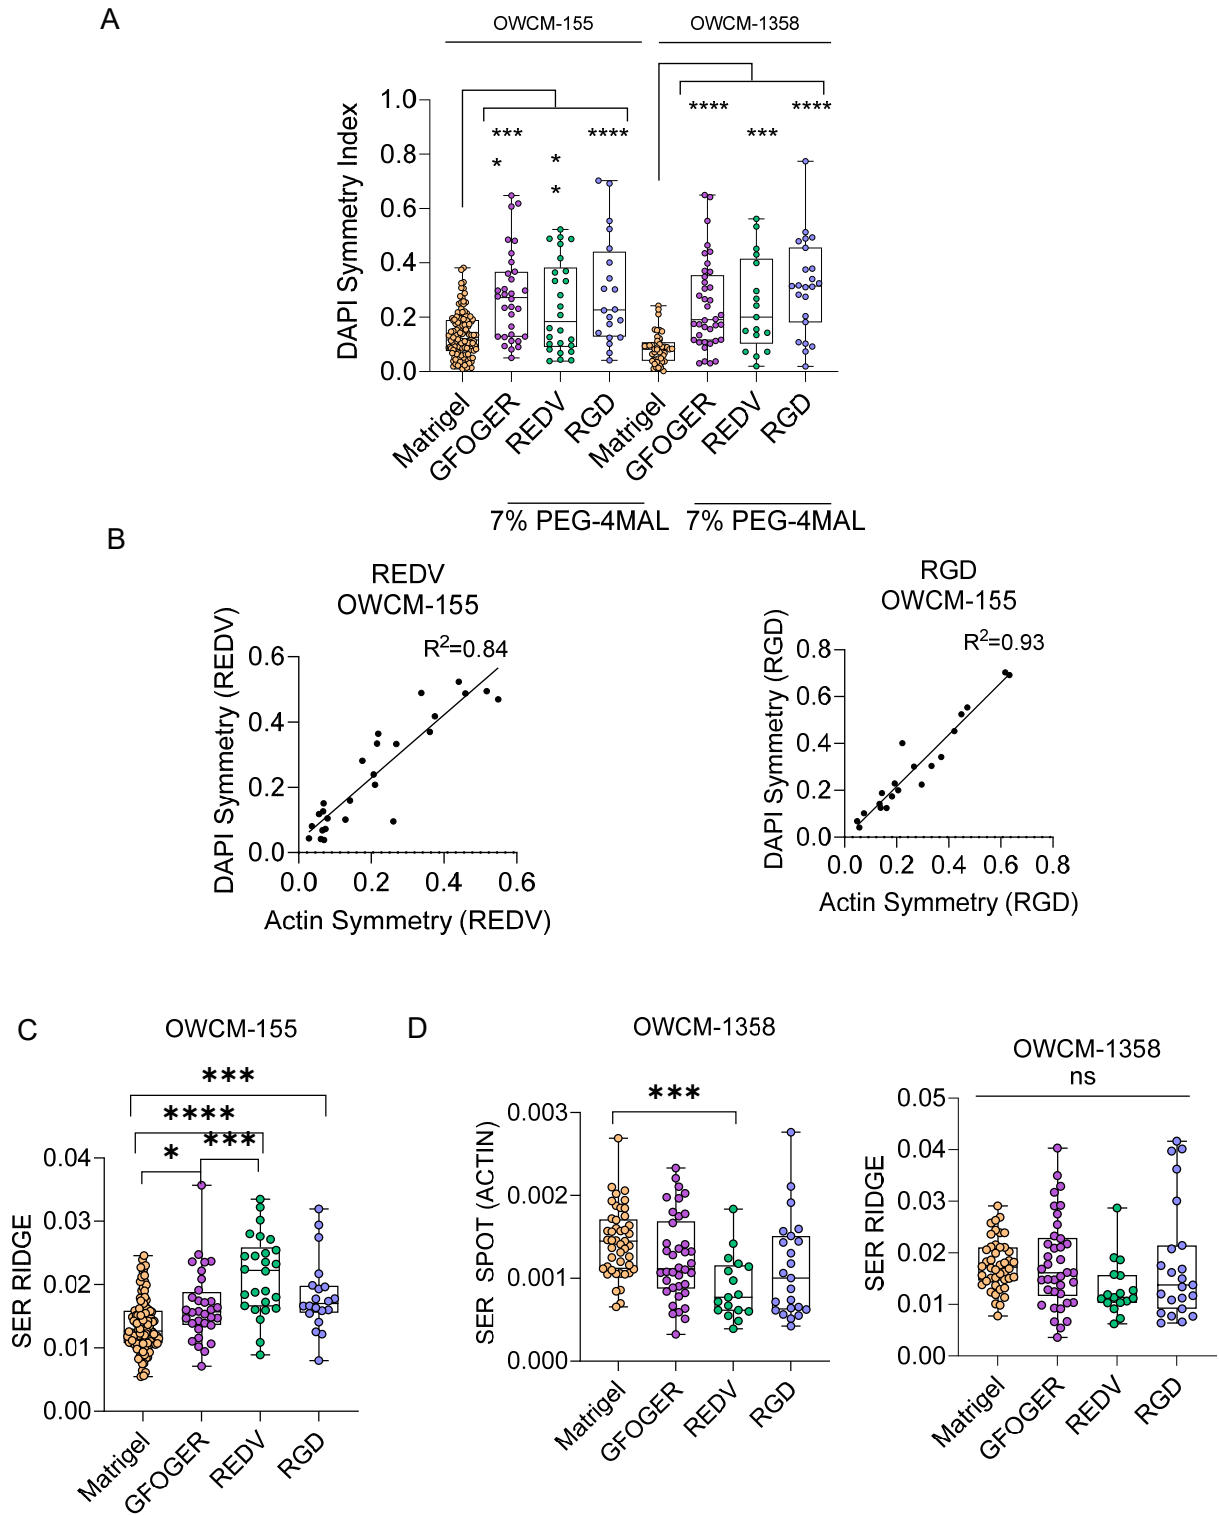

**Supplement Figure 7. Organoid characterization.** **A)** High content imaging characterizes nuclear morphology. (CRPC-NEPC: Matrigel n=128, GFOGER n=32, REDV n=26, RGD n=20. CRPC-Adeno: Matrigel n=45, GFOGER n=38, REDV n=17, RGD n=23). CRPC-NEPC and CRPC-Adeno organoids were compared by a one-way ANOVA, with post-hoc Tukey's test with \*\*p<0.01, \*\*\*p<0.001, and \*\*\*\*p<0.0001. **B)** Correlation analysis between Actin and DAPI symmetry among REDV (left) and RGD (right) organoids (n=26 REDV, n= 20 RGD). **C)** High content imaging for texture analysis of actin SPOT values among CRPC-Adeno organoids (Matrigel n=45, GFOGER n=38, REDV n=17, RGD n=23). **D)** High content imaging analysis of actin RIDGE values among CRPC-NEPC (left) and CRPC-Adeno (right) organoids. For all groups, comparisons were made with a one-way ANOVA with posthoc Tukey's test with \*p<0.05, \*\*p<0.01, \*\*\*p<0.001, and \*\*\*\*p<0.0001.

Supplementary Figure 8  
Related to Fig. 3

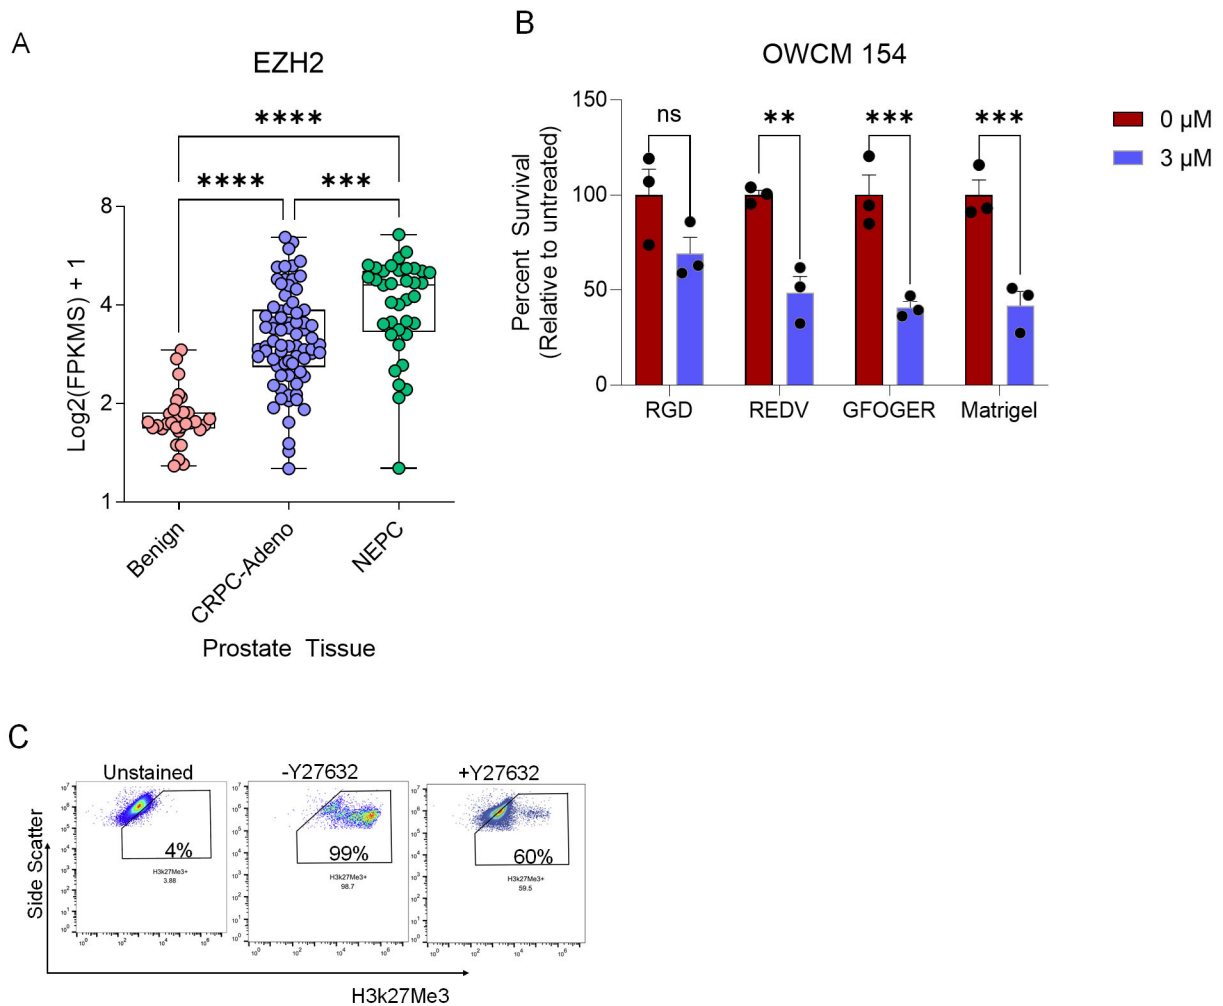

**Supplement Figure 8. Patient tumors and Organoid Characterization.** **A)** Transcriptomic analysis of EZH2 across patient subtypes during disease progression (Benign Prostate n=29, CRPC-Adeno n=66, CRPC-NEPC n=36, Matrigel n=10). **B)** Fold change in OWCM-154 organoid growth area under treatment with an EZH2i GSK343. N =3; a two-tailed t-test evaluated each treated and untreated comparisons with \* $p < 0.05$  and \*\*\*\* $p < 0.0001$ . **C)** Gating schematic for Y27632 analysis of H3k27Me3.

Supplementary Figure 9  
Related to Fig. 4

A

| ENTREZID | SD          | SYMBOL    |
|----------|-------------|-----------|
| 338657   | 0.459148885 | CCDC84    |
| 8358     | 0.378880615 | HIST1H3B  |
| 8335     | 0.368405853 | HIST1H2AF |
| 8031     | 0.355716429 | NCOA4     |
| 2842     | 0.339538849 | GPR19     |
| 1E+08    | 0.337762951 | LOC100240 |
| 129049   | 0.337385822 | SGSM1     |
| 3481     | 0.335933368 | IGF2      |
| 4504     | 0.319926559 | MT3       |
| 644961   | 0.319653917 | ACTG1P20  |
| 23081    | 0.319157434 | KDM4C     |
| 9326     | 0.316186512 | ZNHIT3    |
| 147872   | 0.312234148 | CCDC155   |
| 5608     | 0.308469241 | MAP2K6    |
| 1E+08    | 0.304830714 | ZNF37BP   |
| 27289    | 0.304635795 | RND1      |
| 170393   | 0.302342343 | C10orf91  |
| 151507   | 0.300088151 | MSL3P1    |
| 1.01E+08 | 0.296549863 | MIR3908   |
| 10188    | 0.290460929 | TNK2      |
| 440823   | 0.289665252 | MIAT      |
| 4893     | 0.288408823 | NRAS      |
| 727936   | 0.288240182 | GXYLT2    |
| 79608    | 0.285273261 | RIC3      |
| 8631     | 0.281817823 | SKAP1     |
| 79736    | 0.280246082 | TEFM      |
| 11144    | 0.278859991 | DMC1      |
| 8929     | 0.276651475 | PHOX2B    |
| 9564     | 0.273153903 | BCAR1     |
| 116115   | 0.269267222 | ZNF526    |
| 162989   | 0.26425354  | DEDD2     |
| 221409   | 0.263377105 | SPATS1    |
| 255349   | 0.263008849 | TMEM211   |
| 125476   | 0.261052206 | INO80C    |
| 113878   | 0.259273122 | DTX2      |
| 650669   | 0.259151597 | GAS6-AS1  |
| 64897    | 0.258391918 | C12orf43  |
| 326625   | 0.257876439 | MMAB      |
| 51433    | 0.248550568 | ANAPC5    |
| 3694     | 0.248003732 | ITGB6     |
| 126003   | 0.246982564 | TRAPPC5   |
| 23229    | 0.246903853 | ARHGFE9   |
| 4598     | 0.245726746 | MVK       |
| 344657   | 0.245569091 | LRRIC4    |
| 119395   | 0.244392959 | CALHM3    |
| 91351    | 0.244182703 | DDX60L    |
| 64114    | 0.243558294 | TMBIM1    |

|        |             |           |
|--------|-------------|-----------|
| 399947 | 0.241382319 | C11orf87  |
| 5201   | 0.240755175 | PFDN1     |
| 2876   | 0.239914196 | GPX1      |
| 84771  | 0.239149222 | DDX11L2   |
| 1E+08  | 0.237129329 | MIR1468   |
| 58509  | 0.237085256 | CACTIN    |
| 338699 | 0.23522083  | ANKRD42   |
| 83550  | 0.234131484 | GPR101    |
| 203238 | 0.233398211 | CCDC171   |
| 4637   | 0.231591231 | MYL6      |
| 23636  | 0.231470456 | NUPG2     |
| 259307 | 0.231470456 | IL4I1     |
| 121456 | 0.231033149 | SLC9A7P1  |
| 7177   | 0.229000131 | TPSAB1    |
| 54929  | 0.228645311 | TMEM161   |
| 3615   | 0.228243893 | IMPDH2    |
| 158724 | 0.227144027 | FAM47A    |
| 112724 | 0.226910469 | RDH13     |
| 11082  | 0.226821756 | ESM1      |
| 137872 | 0.22651544  | ADHFE1    |
| 5985   | 0.225373614 | RFC5      |
| 9488   | 0.225151594 | PIGB      |
| 128822 | 0.22472173  | CTS9      |
| 2001   | 0.224699443 | ELF5      |
| 84519  | 0.223482579 | ACRBP     |
| 151903 | 0.223364219 | CCDC12    |
| 150291 | 0.220533734 | MORC2-AS1 |
| 7368   | 0.22053352  | UGT8      |
| 55230  | 0.220435785 | USP40     |
| 2743   | 0.220315371 | GLRB      |
| 55286  | 0.219787489 | C4orf19   |
| 84282  | 0.219455037 | RNF135    |
| 9349   | 0.219266082 | RPL23     |
| 345930 | 0.217050099 | ECT2L     |
| 55101  | 0.216853223 | ATP5L     |
| 286207 | 0.216825265 | CFAP157   |
| 54980  | 0.216644242 | C2orf42   |
| 10411  | 0.215165802 | RAPGEF3   |
| 57521  | 0.215154596 | RPTOR     |
| 9175   | 0.214922083 | MAP3K13   |
| 56104  | 0.213855468 | PCDHGB1   |
| 8563   | 0.213747655 | THOC5     |
| 6120   | 0.213243948 | RPE       |
| 134111 | 0.213194015 | UBE2QL1   |
| 252948 | 0.212816527 | TTY116    |
| 256435 | 0.212716203 | ST6GALNA  |
| 246213 | 0.211530033 | SLC17A8   |
| 54857  | 0.210683734 | GDPD2     |
| 2645   | 0.210593731 | GCK       |
| 8755   | 0.210409479 | ADAM6     |
| 51128  | 0.210366969 | SAR1B     |
| 221806 | 0.209606094 | VWDE      |
| 339456 | 0.209512194 | TMEM52    |

B

|        | AR             |           | KLK3           |           | ENO2           |           | NXK3-1         |           | ARV7           |           | CHGA           |           | SYP            |                 | FOLH1 (PSM)    |                 |
|--------|----------------|-----------|----------------|-----------|----------------|-----------|----------------|-----------|----------------|-----------|----------------|-----------|----------------|-----------------|----------------|-----------------|
|        | CRPC NEPC      | CRPC NEPC       | CRPC NEPC      | CRPC NEPC       |
|        | log2FoldChange | pvalue          | log2FoldChange | pvalue          |
| RGD    | #N/A           | #N/A      | #N/A           | #N/A      | 0.104994       | 0.532742  | -0.16896       | 0.446354  | #N/A           | #N/A      | 0.601702       | 0.431524  | 0.03287        | 0.922316        | 0.286756       | 0.279733        |
| REDV   | #N/A           | #N/A      | #N/A           | #N/A      | -0.08159       | 0.533777  | -0.1519        | 0.388967  | #N/A           | #N/A      | -0.02633       | 0.869442  | -0.33927       | <b>0.037969</b> | 0.372935       | <b>0.038219</b> |
| GFOGER | #N/A           | #N/A      | #N/A           | #N/A      | -0.11749       | 0.323558  | -0.09705       | 0.574255  | #N/A           | #N/A      | -0.03255       | 0.81953   | -0.28632       | 0.058582        | 0.219247       | 0.219479        |

C

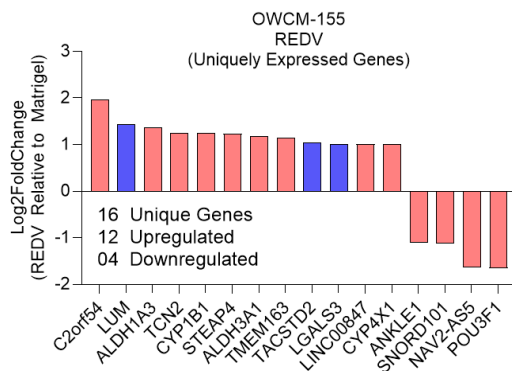

Supplementary Figure 9. DNA Methylation and RNA-seq analysis. A) List of the top 100 most variable promoters of methylation. This analysis is based on the standard deviation of promoter

methylation across all the samples. **B)** Relative change in hallmark prostate cancer genes in various ECM conditions relative to Matrigel. **C)** Unique genes expressed by OWCM-155 tumors grown in REDV hydrogels. Blue indicated genes that are related to cell adhesion or cytoskeletal pathways.

Supplementary Figure 10  
Related to Fig. 4

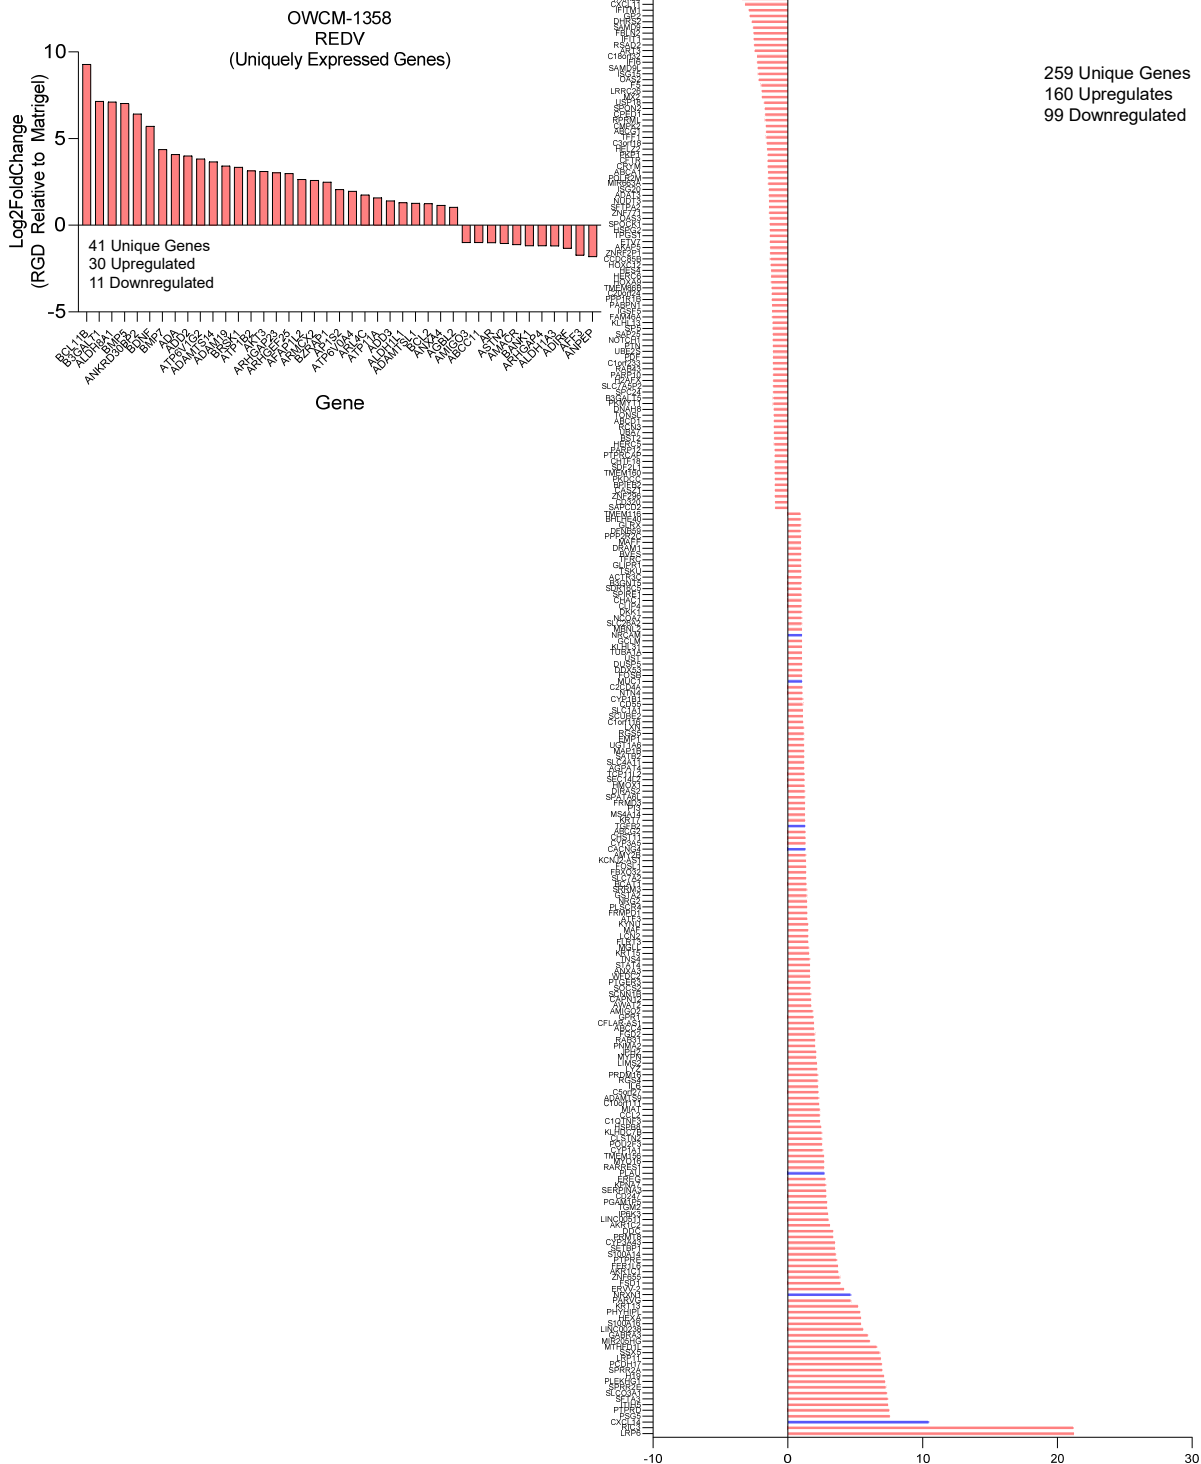

**Supplementary Figure 10.** Uniquely expressed genes in REDV and GFOGER-functionalized PEG-4MAL-based organoids in CRPC-Adeno. (n=3 per condition). Blue indicates genes that are

related to cell adhesion or cytoskeletal pathways.

Supplementary Figure 11  
Related to Fig. 5

| GS follow link to MSigDB | GS DETAILS                 | SIZE | ES   | NES  | NOM p-val | FDR q-val | FWER p-val | RANK AT MAX | LEADING EDGE                   |
|--------------------------|----------------------------|------|------|------|-----------|-----------|------------|-------------|--------------------------------|
| 1 GO:0031012             | <a href="#">Details...</a> | 192  | 0.65 | 1.71 | 0.000     | 0.001     | 0.001      | 2921        | tags=53%, list=19%, signal=65% |
| 2 GO:0007155             | <a href="#">Details...</a> | 459  | 0.53 | 1.43 | 0.000     | 0.040     | 0.079      | 2766        | tags=34%, list=18%, signal=40% |
| 3 GO:0007389             | <a href="#">Details...</a> | 41   | 0.52 | 1.27 | 0.119     | 0.093     | 0.254      | 3726        | tags=39%, list=24%, signal=51% |
| 4 GO:0043565             | <a href="#">Details...</a> | 364  | 0.40 | 1.08 | 0.220     | 0.363     | 0.813      | 4374        | tags=37%, list=29%, signal=51% |
| 5 GO:0048598             | <a href="#">Details...</a> | 19   | 0.48 | 1.07 | 0.409     | 0.301     | 0.825      | 3504        | tags=32%, list=23%, signal=41% |

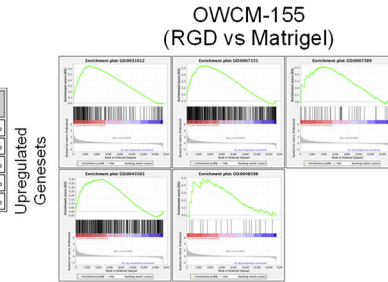

| GS follow link to MSigDB | GS DETAILS                 | SIZE | ES   | NES  | NOM p-val | FDR q-val | FWER p-val | RANK AT MAX | LEADING EDGE                   |
|--------------------------|----------------------------|------|------|------|-----------|-----------|------------|-------------|--------------------------------|
| 1 GO:0031012             | <a href="#">Details...</a> | 187  | 0.53 | 1.76 | 0.000     | 0.002     | 0.002      | 2742        | tags=45%, list=18%, signal=55% |
| 2 GO:0007155             | <a href="#">Details...</a> | 453  | 0.49 | 1.75 | 0.000     | 0.001     | 0.002      | 2215        | tags=31%, list=14%, signal=35% |
| 3 GO:0007389             | <a href="#">Details...</a> | 42   | 0.48 | 1.34 | 0.118     | 0.071     | 0.205      | 1842        | tags=33%, list=12%, signal=38% |
| 4 GO:0043565             | <a href="#">Details...</a> | 364  | 0.27 | 0.94 | 0.644     | 0.605     | 0.966      | 2525        | tags=19%, list=17%, signal=22% |

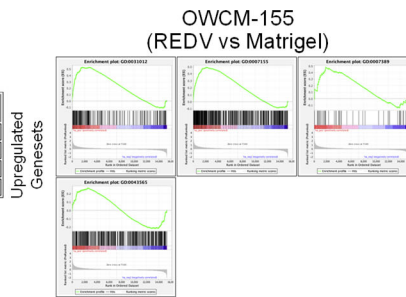

| GS follow link to MSigDB | GS DETAILS                 | SIZE | ES    | NES   | NOM p-val | FDR q-val | FWER p-val | RANK AT MAX | LEADING EDGE                |
|--------------------------|----------------------------|------|-------|-------|-----------|-----------|------------|-------------|-----------------------------|
| 1 GO:0048598             | <a href="#">Details...</a> | 19   | -0.28 | -0.73 | 0.842     | 0.910     | 0.667      | 59          | tags=5%, list=0%, signal=5% |

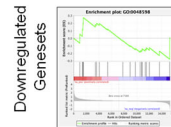

| GS follow link to MSigDB | GS DETAILS                 | SIZE | ES   | NES  | NOM p-val | FDR q-val | FWER p-val | RANK AT MAX | LEADING EDGE                   |
|--------------------------|----------------------------|------|------|------|-----------|-----------|------------|-------------|--------------------------------|
| 1 GO:0031012             | <a href="#">Details...</a> | 180  | 0.51 | 1.80 | 0.000     | 0.000     | 0.000      | 1467        | tags=34%, list=10%, signal=37% |
| 2 GO:0007155             | <a href="#">Details...</a> | 443  | 0.46 | 1.75 | 0.000     | 0.001     | 0.001      | 2138        | tags=30%, list=14%, signal=35% |
| 3 GO:0007389             | <a href="#">Details...</a> | 40   | 0.36 | 1.00 | 0.451     | 0.616     | 0.854      | 2198        | tags=33%, list=15%, signal=38% |
| 4 GO:0048598             | <a href="#">Details...</a> | 19   | 0.30 | 0.71 | 0.855     | 0.957     | 0.996      | 2019        | tags=21%, list=14%, signal=24% |

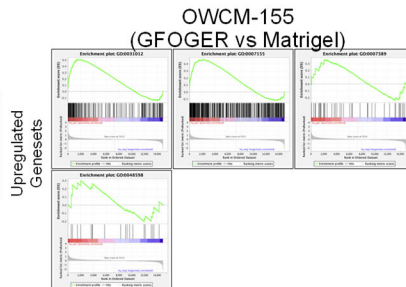

| GS follow link to MSigDB | GS DETAILS                 | SIZE | ES    | NES   | NOM p-val | FDR q-val | FWER p-val | RANK AT MAX | LEADING EDGE                   |
|--------------------------|----------------------------|------|-------|-------|-----------|-----------|------------|-------------|--------------------------------|
| 1 GO:0043565             | <a href="#">Details...</a> | 353  | -0.31 | -1.30 | 0.004     | 0.082     | 0.124      | 2174        | tags=20%, list=15%, signal=23% |

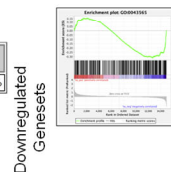



Continued Supplementary Figure 11  
Related to Fig. 5

|   | GS<br>follow link to MSigDB                | GS<br>DETAILS              | SIZE | ES   | NES  | NOM p-<br>val | FDR q-<br>val | FWER p-<br>val | RANK AT<br>MAX | LEADING EDGE                   |
|---|--------------------------------------------|----------------------------|------|------|------|---------------|---------------|----------------|----------------|--------------------------------|
| 1 | LI_PROSTATE_CANCER_EPIGENETIC              | <a href="#">Details...</a> | 25   | 0.73 | 1.67 | 0.000         | 0.001         | 0.001          | 2491           | tags=59%, list=16%, signal=67% |
| 2 | EXTRACELLULAR_MATRIX                       | <a href="#">Details...</a> | 72   | 0.63 | 1.62 | 0.000         | 0.004         | 0.007          | 2939           | tags=53%, list=19%, signal=65% |
| 3 | HALLMARK_EPITHELIAL_MESENCHYMAL_TRANSITION | <a href="#">Details...</a> | 169  | 0.59 | 1.55 | 0.000         | 0.006         | 0.017          | 2921           | tags=44%, list=19%, signal=54% |
| 4 | KEGG_ECM_RECEPTOR_INTERACTION              | <a href="#">Details...</a> | 71   | 0.59 | 1.49 | 0.003         | 0.018         | 0.068          | 2546           | tags=44%, list=17%, signal=52% |
| 5 | GO_NEUROENDOCRINE_CELL_DIFFERENTIATION     | <a href="#">Details...</a> | 8    | 0.68 | 1.27 | 0.180         | 0.139         | 0.490          | 233            | tags=25%, list=2%, signal=25%  |
| 6 | REACTOME_INTEGRIN_SIGNALING                | <a href="#">Details...</a> | 24   | 0.54 | 1.23 | 0.189         | 0.167         | 0.632          | 1544           | tags=21%, list=10%, signal=23% |
| 7 | KONDO_EZH2_TARGETS                         | <a href="#">Details...</a> | 171  | 0.46 | 1.20 | 0.074         | 0.182         | 0.722          | 2955           | tags=28%, list=19%, signal=34% |
| 8 | KEGG_PROSTATE_CANCER                       | <a href="#">Details...</a> | 79   | 0.29 | 0.74 | 0.898         | 0.886         | 1.000          | 4681           | tags=28%, list=31%, signal=40% |

OWCM-155  
(RGD vs Matrigel)

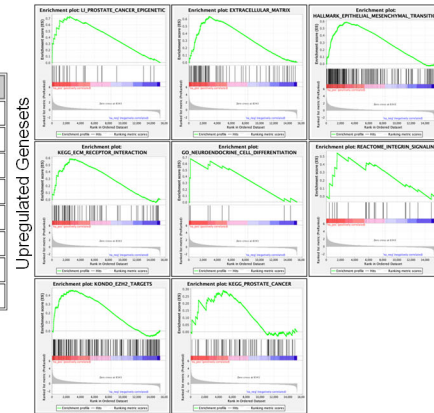

|   | GS<br>follow link to MSigDB                | GS<br>DETAILS              | SIZE | ES   | NES  | NOM p-<br>val | FDR q-<br>val | FWER p-<br>val | RANK AT<br>MAX | LEADING EDGE                   |
|---|--------------------------------------------|----------------------------|------|------|------|---------------|---------------|----------------|----------------|--------------------------------|
| 1 | HALLMARK_EPITHELIAL_MESENCHYMAL_TRANSITION | <a href="#">Details...</a> | 169  | 0.56 | 1.83 | 0.000         | 0.001         | 0.001          | 2476           | tags=37%, list=10%, signal=44% |
| 2 | LI_PROSTATE_CANCER_EPIGENETIC              | <a href="#">Details...</a> | 24   | 0.69 | 1.69 | 0.011         | 0.009         | 0.012          | 1796           | tags=46%, list=12%, signal=52% |
| 3 | KEGG_ECM_RECEPTOR_INTERACTION              | <a href="#">Details...</a> | 70   | 0.56 | 1.66 | 0.001         | 0.009         | 0.020          | 2174           | tags=37%, list=14%, signal=45% |
| 4 | KONDO_EZH2_TARGETS                         | <a href="#">Details...</a> | 177  | 0.48 | 1.59 | 0.000         | 0.019         | 0.058          | 1865           | tags=25%, list=12%, signal=29% |
| 5 | EXTRACELLULAR_MATRIX                       | <a href="#">Details...</a> | 69   | 0.50 | 1.49 | 0.034         | 0.043         | 0.151          | 2831           | tags=45%, list=19%, signal=55% |
| 6 | GO_NEUROENDOCRINE_CELL_DIFFERENTIATION     | <a href="#">Details...</a> | 8    | 0.70 | 1.36 | 0.120         | 0.094         | 0.345          | 1850           | tags=50%, list=12%, signal=57% |
| 7 | REACTOME_INTEGRIN_SIGNALING                | <a href="#">Details...</a> | 24   | 0.47 | 1.16 | 0.290         | 0.277         | 0.788          | 3670           | tags=33%, list=24%, signal=44% |
| 8 | KEGG_PROSTATE_CANCER                       | <a href="#">Details...</a> | 80   | 0.22 | 0.68 | 0.973         | 0.941         | 1.000          | 3583           | tags=20%, list=23%, signal=26% |

OWCM-155  
(REDV vs Matrigel)

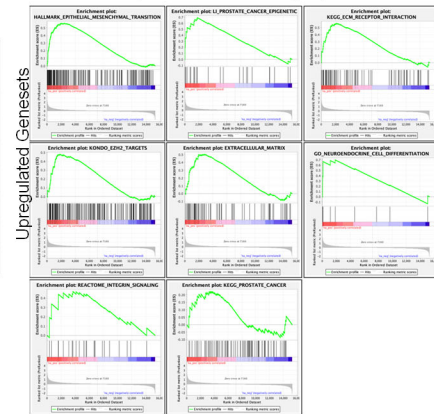

|   | GS<br>follow link to MSigDB                | GS<br>DETAILS              | SIZE | ES   | NES  | NOM p-<br>val | FDR q-<br>val | FWER p-<br>val | RANK AT<br>MAX | LEADING EDGE                   |
|---|--------------------------------------------|----------------------------|------|------|------|---------------|---------------|----------------|----------------|--------------------------------|
| 1 | HALLMARK_EPITHELIAL_MESENCHYMAL_TRANSITION | <a href="#">Details...</a> | 167  | 0.53 | 1.84 | 0.000         | 0.006         | 0.005          | 2068           | tags=36%, list=14%, signal=41% |
| 2 | KEGG_ECM_RECEPTOR_INTERACTION              | <a href="#">Details...</a> | 69   | 0.55 | 1.73 | 0.002         | 0.007         | 0.010          | 2040           | tags=39%, list=14%, signal=46% |
| 3 | LI_PROSTATE_CANCER_EPIGENETIC              | <a href="#">Details...</a> | 24   | 0.64 | 1.63 | 0.012         | 0.017         | 0.031          | 1726           | tags=46%, list=12%, signal=52% |
| 4 | EXTRACELLULAR_MATRIX                       | <a href="#">Details...</a> | 68   | 0.48 | 1.49 | 0.021         | 0.046         | 0.108          | 2720           | tags=44%, list=18%, signal=54% |
| 5 | GO_NEUROENDOCRINE_CELL_DIFFERENTIATION     | <a href="#">Details...</a> | 7    | 0.75 | 1.44 | 0.083         | 0.053         | 0.156          | 120            | tags=29%, list=1%, signal=29%  |
| 6 | KONDO_EZH2_TARGETS                         | <a href="#">Details...</a> | 176  | 0.41 | 1.44 | 0.004         | 0.045         | 0.158          | 2058           | tags=27%, list=14%, signal=31% |
| 7 | REACTOME_INTEGRIN_SIGNALING                | <a href="#">Details...</a> | 24   | 0.42 | 1.09 | 0.355         | 0.360         | 0.810          | 1451           | tags=17%, list=10%, signal=19% |
| 8 | KEGG_PROSTATE_CANCER                       | <a href="#">Details...</a> | 80   | 0.21 | 0.68 | 0.964         | 0.950         | 1.000          | 1939           | tags=11%, list=13%, signal=13% |

OWCM-155  
(GFOGER vs Matrigel)

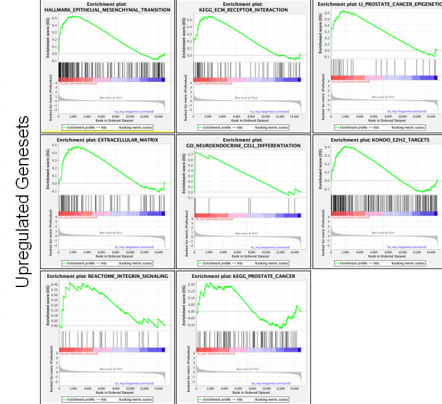

Continued Supplementary Figure 11  
Related to Fig. 5

| 1 | GS                                         | GS DETAIL                  | SIZE | ES   | NES  | NOM p | FDR q | FWER p | FWER q | FWER AT MAX | LEADING EDGE                 |
|---|--------------------------------------------|----------------------------|------|------|------|-------|-------|--------|--------|-------------|------------------------------|
| 1 | GO_NEUROENDOCRINE_CELL_DIFFERENTIATION     | <a href="#">Details...</a> | 7    | 0.92 | 1.56 | 0.003 | 0.019 | 0.018  | 968    | 80%         | sig=53%, hit=6%, signal=61%  |
| 2 | HALLMARK_EPITHELIAL_MESENCHYMAL_TRANSITION | <a href="#">Details...</a> | 172  | 0.68 | 1.55 | 0.000 | 0.013 | 0.025  | 1864   | 80%         | sig=30%, hit=12%, signal=42% |
| 3 | KONDO_EZH2_TARGETS                         | <a href="#">Details...</a> | 180  | 0.64 | 1.45 | 0.001 | 0.061 | 0.158  | 2790   | 80%         | sig=34%, hit=19%, signal=53% |
| 4 | KEGG_ECM_RECEPTOR_INTERACTION              | <a href="#">Details...</a> | 72   | 0.65 | 1.44 | 0.019 | 0.049 | 0.168  | 1737   | 80%         | sig=26%, hit=11%, signal=37% |
| 5 | EXTRACELLULAR_MATRIX                       | <a href="#">Details...</a> | 75   | 0.61 | 1.33 | 0.062 | 0.120 | 0.442  | 1062   | 80%         | sig=27%, hit=7%, signal=34%  |
| 6 | REACTOME_INTEGRIN_SIGNALING                | <a href="#">Details...</a> | 24   | 0.54 | 1.09 | 0.407 | 0.499 | 0.958  | 3115   | 80%         | sig=29%, hit=20%, signal=49% |
| 7 | KEGG_PROSTATE_CANCER                       | <a href="#">Details...</a> | 80   | 0.48 | 1.07 | 0.407 | 0.456 | 0.969  | 1124   | 80%         | sig=13%, hit=7%, signal=20%  |
| 8 | LI_PROSTATE_CANCER_EPIGENETIC              | <a href="#">Details...</a> | 27   | 0.45 | 0.90 | 0.624 | 0.670 | 1.000  | 1860   | 80%         | sig=30%, hit=12%, signal=42% |

OWCM-1358  
(RGD vs Matrigel)

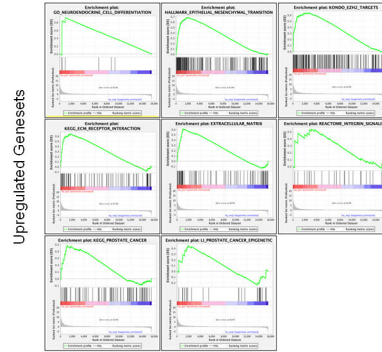

OWCM-1358  
(REDV vs Matrigel)

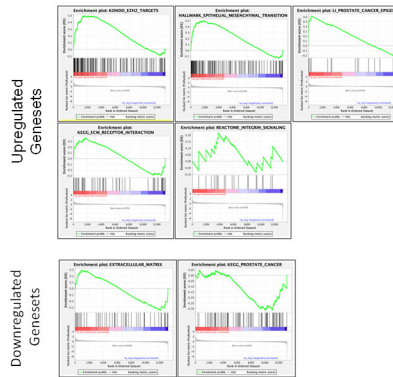

| 1 | GS                                         | GS DETAIL                  | SIZE | ES   | NES  | NOM p | FDR q | FWER p | FWER q | FWER AT MAX | LEADING EDGE                 |
|---|--------------------------------------------|----------------------------|------|------|------|-------|-------|--------|--------|-------------|------------------------------|
| 1 | KONDO_EZH2_TARGETS                         | <a href="#">Details...</a> | 184  | 0.69 | 1.80 | 0.000 | 0.002 | 0.001  | 1676   | 80%         | sig=37%, hit=17%, signal=54% |
| 2 | HALLMARK_EPITHELIAL_MESENCHYMAL_TRANSITION | <a href="#">Details...</a> | 196  | 0.50 | 1.81 | 0.000 | 0.001 | 0.001  | 1776   | 80%         | sig=26%, hit=10%, signal=36% |
| 3 | LI_PROSTATE_CANCER_EPIGENETIC              | <a href="#">Details...</a> | 23   | 0.62 | 1.70 | 0.007 | 0.007 | 0.016  | 363    | 80%         | sig=27%, hit=7%, signal=34%  |
| 4 | KEGG_ECM_RECEPTOR_INTERACTION              | <a href="#">Details...</a> | 81   | 0.36 | 1.19 | 0.200 | 0.290 | 0.604  | 1860   | 80%         | sig=27%, hit=10%, signal=37% |
| 5 | REACTOME_INTEGRIN_SIGNALING                | <a href="#">Details...</a> | 20   | 0.21 | 0.56 | 0.962 | 0.965 | 0.998  | 3787   | 80%         | sig=46%, hit=20%, signal=66% |

| 1 | GS                   | GS DETAIL                  | SIZE | ES   | NES  | NOM p | FDR q | FWER p | FWER q | FWER AT MAX | LEADING EDGE                 |
|---|----------------------|----------------------------|------|------|------|-------|-------|--------|--------|-------------|------------------------------|
| 1 | EXTRACELLULAR_MATRIX | <a href="#">Details...</a> | 49   | 0.34 | 0.72 | 0.158 | 0.298 | 0.306  | 999    | 80%         | sig=24%, hit=6%, signal=30%  |
| 2 | KEGG_PROSTATE_CANCER | <a href="#">Details...</a> | 78   | 0.31 | 1.21 | 0.130 | 0.167 | 0.357  | 2053   | 80%         | sig=24%, hit=16%, signal=40% |

OWCM-1358  
(GFOGER vs Matrigel)

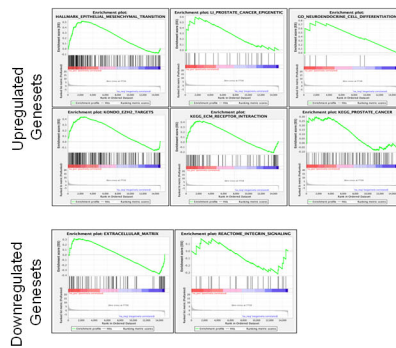

| 1 | GS                                         | GS DETAIL                  | SIZE | ES   | NES  | NOM p | FDR q | FWER p | FWER q | FWER AT MAX | LEADING EDGE                 |
|---|--------------------------------------------|----------------------------|------|------|------|-------|-------|--------|--------|-------------|------------------------------|
| 1 | HALLMARK_EPITHELIAL_MESENCHYMAL_TRANSITION | <a href="#">Details...</a> | 160  | 0.51 | 1.60 | 0.001 | 0.073 | 0.069  | 2436   | 80%         | sig=47%, hit=16%, signal=63% |
| 2 | LI_PROSTATE_CANCER_EPIGENETIC              | <a href="#">Details...</a> | 24   | 0.58 | 1.40 | 0.079 | 0.140 | 0.261  | 1572   | 80%         | sig=25%, hit=11%, signal=36% |
| 3 | GO_NEUROENDOCRINE_CELL_DIFFERENTIATION     | <a href="#">Details...</a> | 6    | 0.78 | 1.40 | 0.103 | 0.121 | 0.314  | 1653   | 80%         | sig=25%, hit=12%, signal=37% |
| 4 | KONDO_EZH2_TARGETS                         | <a href="#">Details...</a> | 172  | 0.44 | 1.38 | 0.037 | 0.118 | 0.386  | 2655   | 80%         | sig=36%, hit=18%, signal=54% |
| 5 | KEGG_ECM_RECEPTOR_INTERACTION              | <a href="#">Details...</a> | 70   | 0.41 | 1.21 | 0.185 | 0.216 | 0.665  | 2134   | 80%         | sig=36%, hit=14%, signal=50% |
| 6 | KEGG_PROSTATE_CANCER                       | <a href="#">Details...</a> | 78   | 0.30 | 0.87 | 0.681 | 0.662 | 0.995  | 1610   | 80%         | sig=19%, hit=11%, signal=30% |

| 1 | GS                          | GS DETAIL                  | SIZE | ES   | NES  | NOM p | FDR q | FWER p | FWER q | FWER AT MAX | LEADING EDGE                 |
|---|-----------------------------|----------------------------|------|------|------|-------|-------|--------|--------|-------------|------------------------------|
| 1 | EXTRACELLULAR_MATRIX        | <a href="#">Details...</a> | 48   | 0.30 | 1.35 | 0.053 | 0.184 | 0.173  | 840    | 80%         | sig=22%, hit=6%, signal=28%  |
| 2 | REACTOME_INTEGRIN_SIGNALING | <a href="#">Details...</a> | 23   | 0.22 | 0.50 | 0.629 | 0.638 | 0.762  | 1132   | 80%         | sig=22%, hit=16%, signal=38% |

Supplementary Figure 11. GSEA analysis of differential regulation of genesets in CRPC-NEPC and CRPC-Adeno organoids (n=3 per condition)

Supplementary Figure 12  
Related to Fig. 5

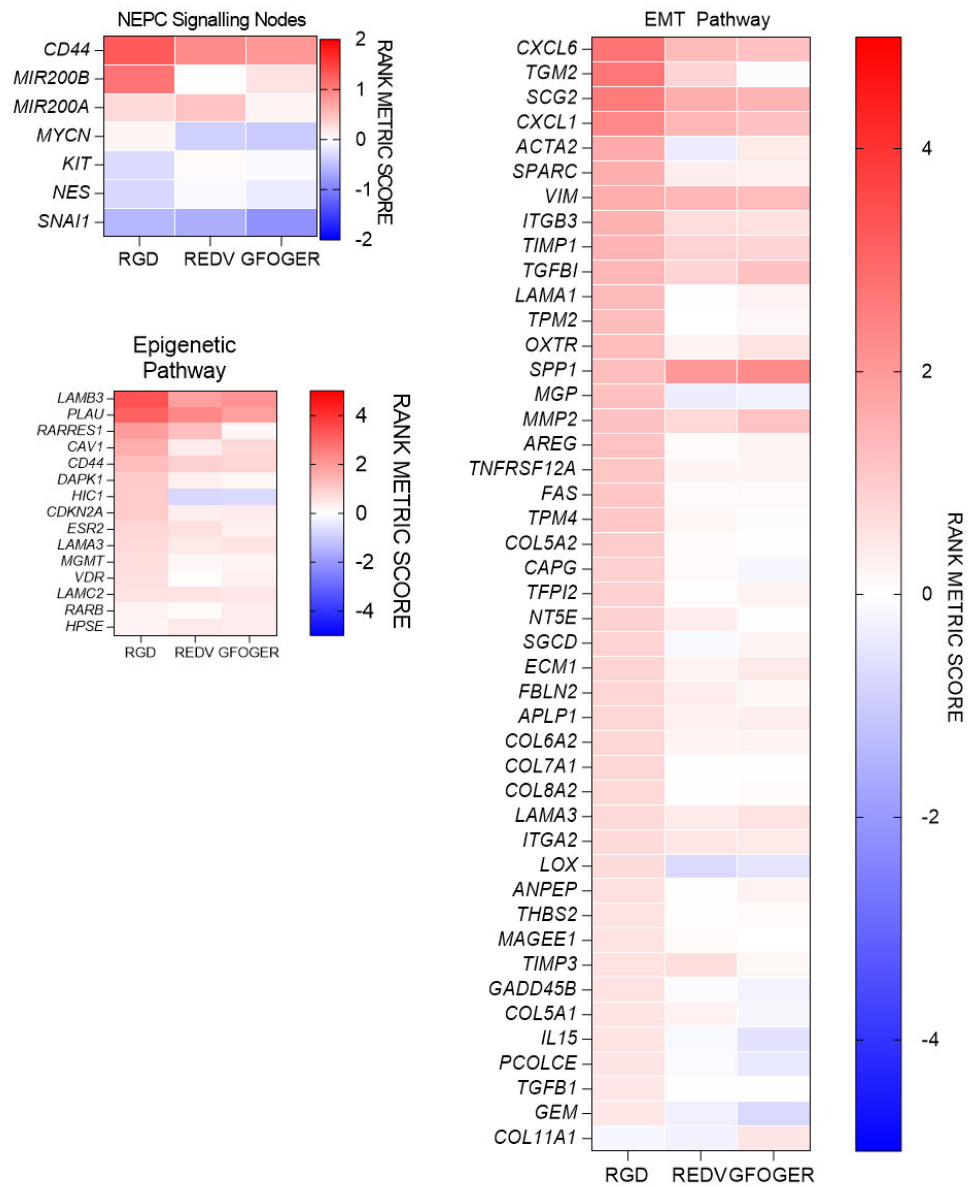

**Supplementary Figure 12.** GSEA analysis of differential regulation of genesets in CRPC-NEPC OWC155 organoids (n=3 per condition)

Supplementary Figure 13  
Related to Fig. 5

OWCM-1358

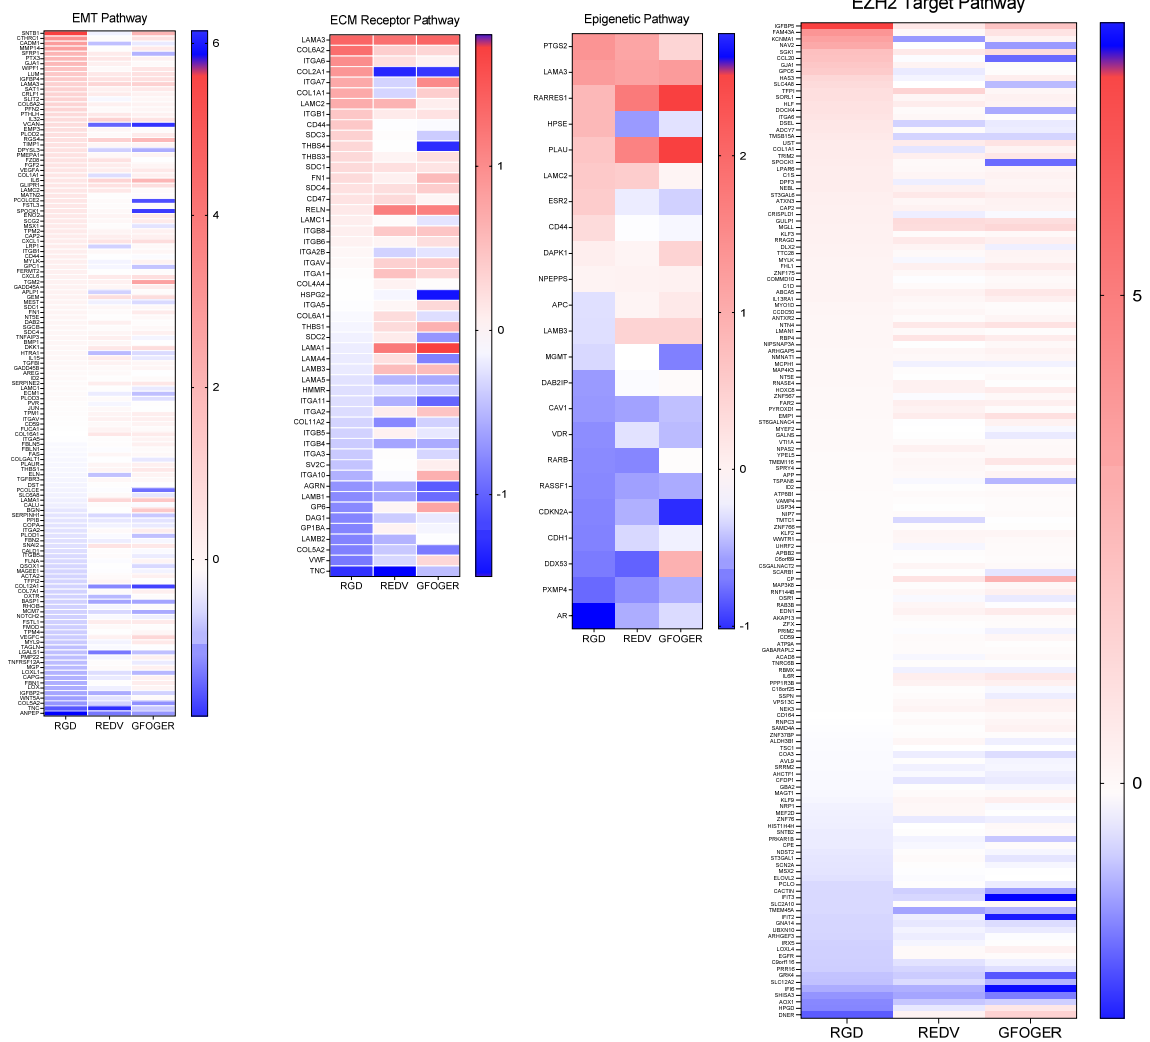

**Supplementary Figure 13.** GSEA analysis of differential regulation of genesets in CRPC-Adeno OWCM-1358 organoids (n=3 per condition)

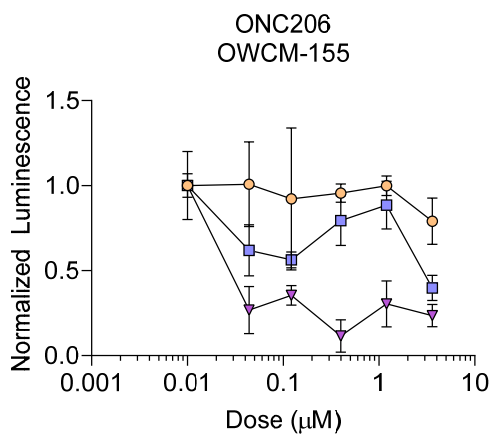

**Supplementary Figure 14.** Drug response curves in OWCM-155 organoids for ONC206 treatment with and without EZH2 inhibitor, GSK343 (n=5 per condition). Each growth condition was normalized to untreated conditions for that group.

| Antibody                                                                             | Vendor                    | Catalog        | Clone      |
|--------------------------------------------------------------------------------------|---------------------------|----------------|------------|
| CD29                                                                                 | Epitomics                 | 1798-1         | EP1041Y    |
| EZH2                                                                                 | BD Biosciences            | 612666         | 11/EZH2    |
| Goat anti-Rabbit IgG (H+L) Highly Cross-Adsorbed Secondary Antibody, Alexa Fluor 488 | Thermo Fisher Scientific  | A-11034        | N/A        |
| Goat anti-Mouse IgG (H+L) Superclonal™ Secondary Antibody, Alexa Fluor 555           | Thermo Fisher Scientific  | A-28180        | N/A        |
| Integrin alpha-2                                                                     | Abcam                     | ab133557       | EPR5788    |
| Alexa Fluor 647 anti-mouse/human Ki-67                                               | BioLegend                 | 151206         | 11F6       |
| NKX3.1                                                                               | Biocare Medical           | CP422A         | N/A        |
| Alexa Fluor 488 Phalloidin                                                           | Cell Signaling Technology | 8878S          | N/A        |
| Synaptophysin                                                                        | Leica                     | PA0299         | 27G12      |
| Tri Methyl Histone H3 (Lys27)                                                        | Cell Signaling Technology | 9733S          | C36B11     |
| Vimentin Alexa Fluor 647                                                             | Thermo Fisher Scientific  | MA5-11883-A647 | V9         |
| EZH2                                                                                 | Abcam                     | ab231165       | EPR9307(2) |
| H3K27me3                                                                             | Cell signaling Technology | 9733BF         | C36B11     |
| Anti-rabbit IgG (H+L), F(ab') <sub>2</sub> Fragment (Alexa Fluor® 488 Conjugate)     | Cell signaling Technology |                | 4412       |

**Supplementary Figure 14.** Antibodies used in studies.
